# Supplementary material for: Biomaterials and oxygen join forces to shape the immune response and boost SARS-CoV-2 vaccines
Source: Research Square preprint supplement (doi:10.21203/rs.3.rs-102055/v1), 2020-11-11
Supplement: Supplementary file 1 [file 544d1f0c406c9c3bcb5cbaa2.docx]

**Supplementary Information**


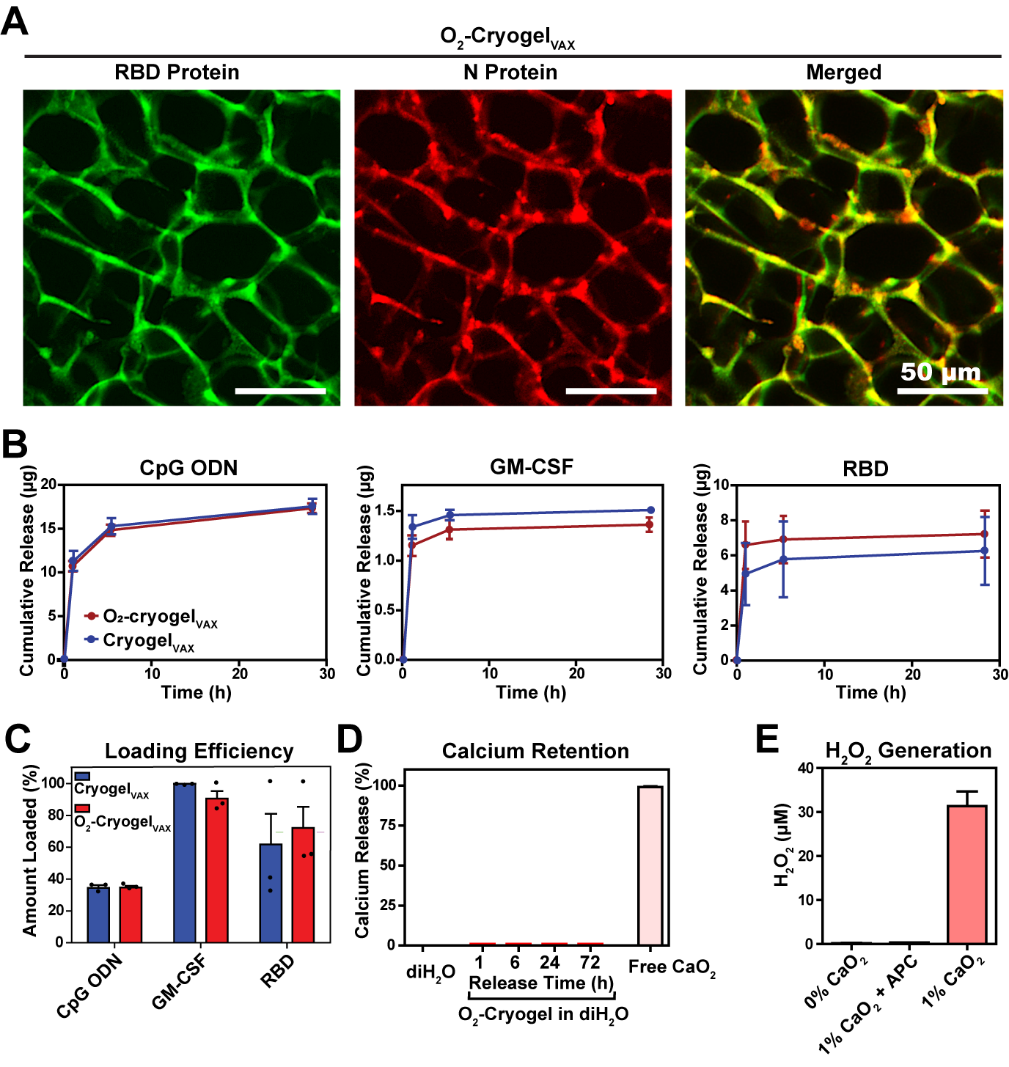


**Fig. S1. Efficient encapsulation and sustained release of SARS-CoV-2 subunit proteins and immunomodulatory factors from cryogels.** (A) Confocal microscopy images showing co-encapsulation of Alexa Fluor 488-labeled RBD and Alexa Fluor 647-labeled N protein within the polymer walls of O2-CryogelVAX. (B) Cumulative release and (C) Loading efficiency of CpG-ODN 1826, GM-CSF and RBD in CryogelVAX and O2-CryogelVAX. (D) Calcium release from O2-Cryogels, incubated at 37°C in diH2O, and quantified using a hardness test. (E) H2O2 release from O2-Cryogels. Data is represented as mean ± SEM (n=3–5).


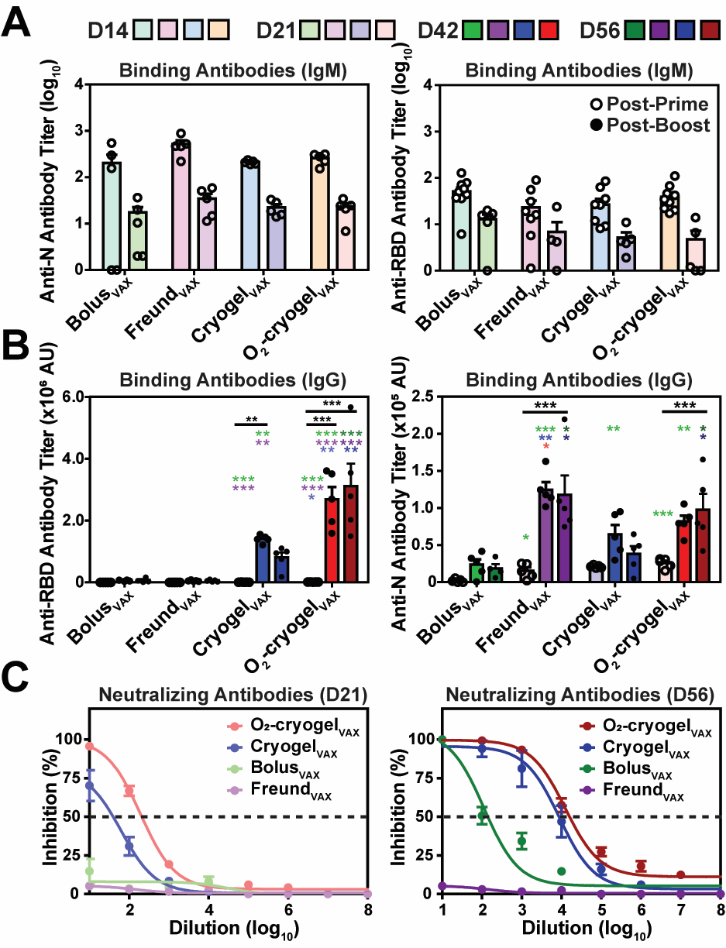


**Fig. S2. O2-CryogelVAX enhances the humoral immune response against SARS-CoV-2.** (A–B) Endpoint titers of RBD- and N- specific IgM (A – day 14 and 21) and IgG (B – day 21, 42 and 56) antibody determined by ELISA. (C) Inhibition rate as the function of serum dilution of the SARS-CoV-2 surrogate virus neutralization test at day 21 and 56. Data points show individual serum sample and data is represented as mean ± SEM (n=5). *P < 0.05, **P < 0.01 and ***P < 0.001.


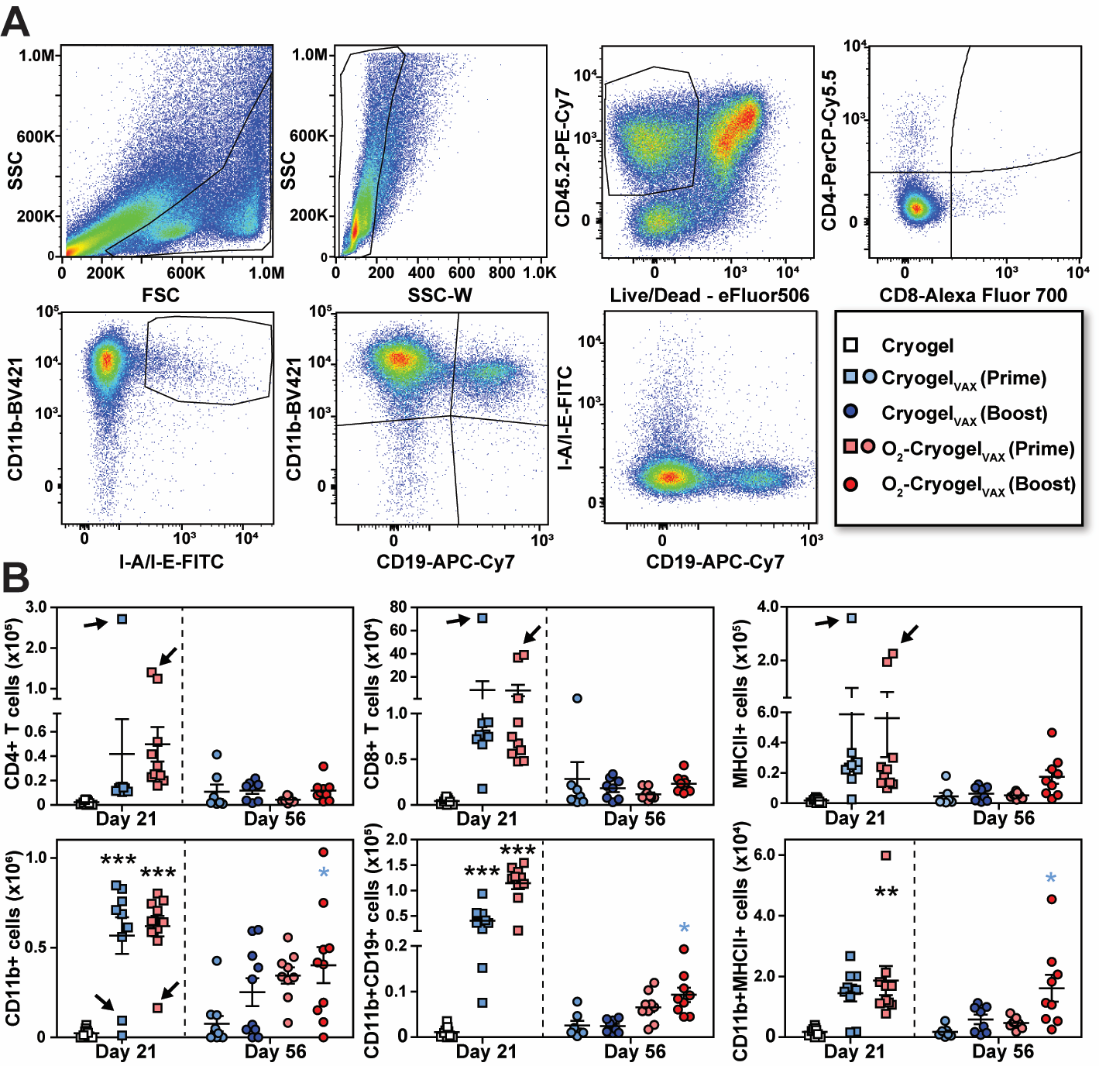


**Fig. S3. Cryogels contain limited numbers of adaptive immune cells after 56 days.** (A) Flow cytometry gating strategy and (B) cell numbers in cryogels at day 21 and 56 post-vaccination. Arrows indicate corresponding gels with high numbers of T cells and MHCII+ B cells. Data points show individual cryogels and data is represented as mean ± SEM (n=5). *P < 0.05, **P < 0.01 and ***P < 0.001.

**
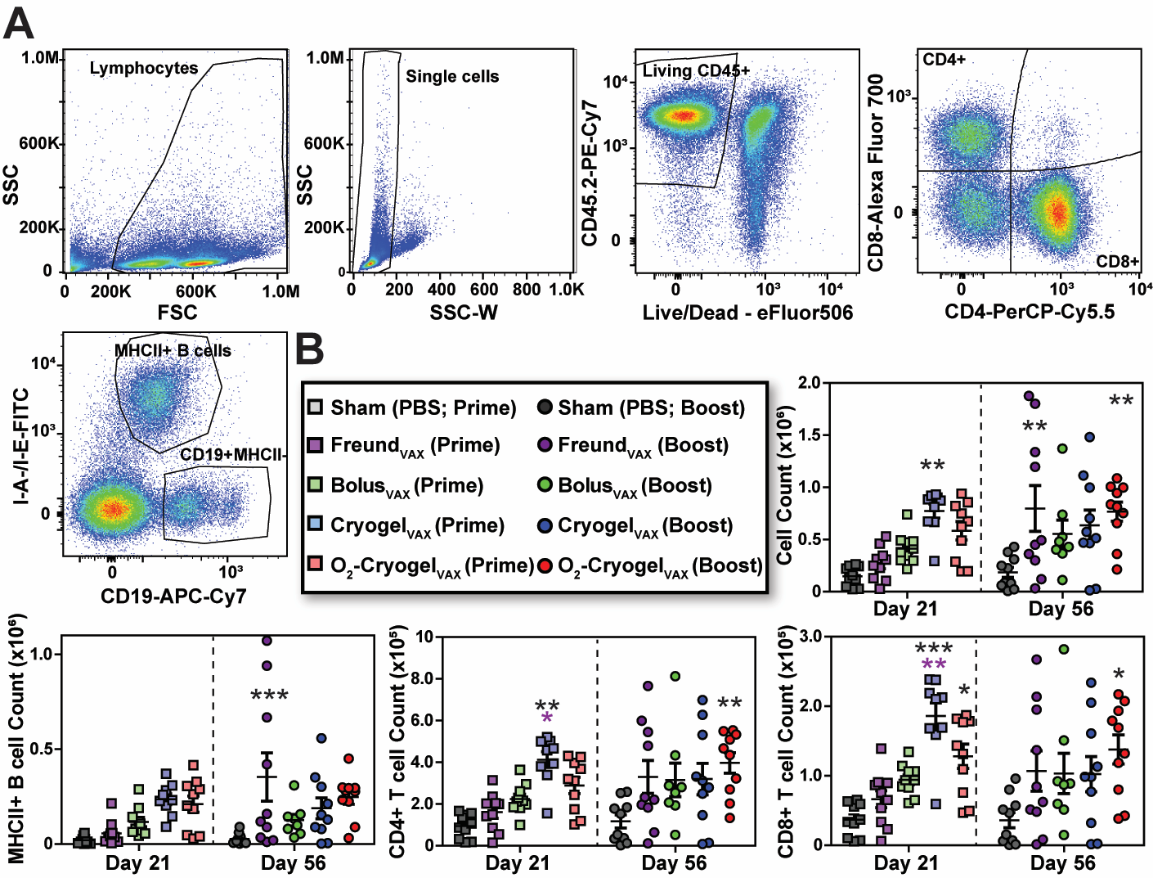
**

**Fig. S4. Vaccination with CryogelVAX and O2-CryogelVAX increases adaptive immune cell numbers in draining LNs.** (A) Flow cytometry gating strategy and (B) cell numbers in LNs at day 21 and 56 post-vaccination. Two draining LNs were analyzed per animal. Data points show individual LNs and data is represented as mean ± SEM. *P < 0.05, **P < 0.01 and ***P < 0.001.


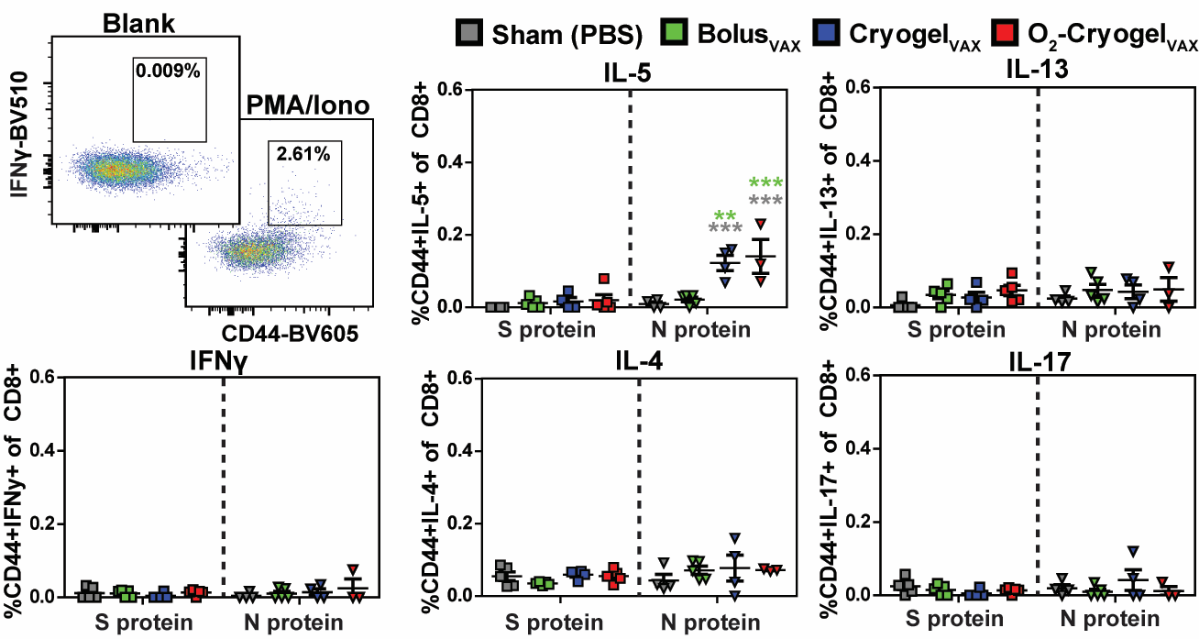


**Fig. S5. O2-CryogelVAX induces IL-5-producing N-specific CD8+ T cells.** Gating and frequencies of cytokine-producing CD44-positive CD8+ T cells after S and N protein-derived peptide stimulation of splenocytes isolated at day 21, as quantified by flow cytometry. Data is represented as mean ± SEM (n=5). *P < 0.05, **P < 0.01 and ***P < 0.001.
